# Supplementary material for: Daratumumab Interferes with Histocompatibility Crossmatch Impacting Immunological Assessment in Solid Organ Transplantation
Source: Preprints.org preprint supplement (doi:10.20944/preprints202209.0161.v1), 2022-09-13
Supplement: Supplementary file 1 [file supplementary]

| Donor | Cell Source                  | DTT treatment         | T-cell CD38 | B-cell CD38 | T-cell HLA Class I | B-cell HLA Class I | B-cell HLA Class II |
|-------|------------------------------|-----------------------|-------------|-------------|--------------------|--------------------|---------------------|
| A     | Peripheral Blood Lymphocytes | Untreated             | 253         | 262         | 501                | 464                | 536                 |
|       |                              | 0.05M, 10 min at 37°C | 230         | 179         | 535                | 474                | 535                 |
|       |                              | 0.05M, 20 min at 37°C | 243         | 183         | 540                | 498                | 541                 |
|       |                              | 0.05M, 30 min at 37°C | 242         | 183         | 546                | 494                | 535                 |
|       |                              | 0.10M, 10 min at 37°C | 240         | 180         | 539                | 499                | 548                 |
|       |                              | 0.10M, 20 min at 37°C | 242         | 180         | 545                | 494                | 539                 |
|       |                              | 0.10M, 30 min at 37°C | 243         | 185         | 531                | 486                | 533                 |
| B     | Peripheral Blood Lymphocytes | Untreated             | 257         | 255         | 469                | 522                | 639                 |
|       |                              | 0.05M, 10 min at 37°C | 246         | 217         | 510                | 555                | 645                 |
|       |                              | 0.05M, 20 min at 37°C | 246         | 215         | 522                | 562                | 646                 |
|       |                              | 0.05M, 30 min at 37°C | 246         | 218         | 520                | 556                | 642                 |
|       |                              | 0.10M, 10 min at 37°C | 247         | 214         | 507                | 546                | 645                 |
|       |                              | 0.10M, 20 min at 37°C | 248         | 213         | 512                | 552                | 637                 |
|       |                              | 0.10M, 30 min at 37°C | 249         | 219         | 514                | 542                | 635                 |
| C     | Spleen Lymphocytes           | Untreated             | 275         | 283         | 464                | 488                | 674                 |
|       |                              | 0.05M, 10 min at 37°C | 233         | 231         | 520                | 501                | 677                 |
|       |                              | 0.05M, 20 min at 37°C | 234         | 228         | 523                | 494                | 670                 |
|       |                              | 0.05M, 30 min at 37°C | 240         | 225         | 528                | 490                | 647                 |
|       |                              | 0.10M, 10 min at 37°C | 231         | 225         | 518                | 489                | 666                 |
|       |                              | 0.10M, 20 min at 37°C | 235         | 223         | 525                | 492                | 663                 |
|       |                              | 0.10M, 30 min at 37°C | 239         | 233         | 523                | 479                | 654                 |

Note: Values are expressed in Median Fluorescence Channels (MCF)
