# Supplementary material for: Daratumumab Interferes with Histocompatibility Crossmatch Impacting Immunological Assessment in Solid Organ Transplantation
Source: Preprints.org preprint supplement (doi:10.20944/preprints202209.0161.v1), 2022-09-13
Supplement: Supplementary file 2 [file supplementary]

|                   |                                 |      | Neat + Pronase |        |        |        | DTT Treatment<br>10 mins at 37°C + Pronase |        |            |        | DTT Treatment<br>30 mins at 37°C + Proanse |        |            |        |
|-------------------|---------------------------------|------|----------------|--------|--------|--------|--------------------------------------------|--------|------------|--------|--------------------------------------------|--------|------------|--------|
|                   |                                 |      | T-Cell         |        | B-Cell |        | T-Cell                                     |        | B-Cell     |        | T-Cell                                     |        | B-Cell     |        |
| Serum Date        | Serum Treatment                 |      | MCS            | Result | MCS    | Result | MCS                                        | Result | MCS        | Result | MCS                                        | Result | MCS        | Result |
| Surrogate Donor A | 6/19/2021                       | Neat | 42             | POS    | 79     | POS    | -8                                         | neg    | -57        | neg    | -12                                        | neg    | -60        | neg    |
|                   | 8/31/2021                       | Neat | 42             | POS    | 86     | POS    | -14                                        | neg    | -67        | neg    | -14                                        | neg    | -65        | neg    |
|                   | 10/5/2021                       | Neat | 42             | POS    | 91     | POS    | -18                                        | neg    | -63        | neg    | -23                                        | neg    | -68        | neg    |
|                   | 10/12/2021                      | Neat | 41             | POS    | 83     | POS    | -15                                        | neg    | -63        | neg    | -21                                        | neg    | -68        | neg    |
|                   | 10/26/2021                      | Neat | 42             | POS    | 85     | POS    | -15                                        | neg    | -59        | neg    | -21                                        | neg    | -81        | neg    |
|                   | 6/19/2021                       | DTT  | 45             | POS    | 101    | POS    |                                            |        |            |        |                                            |        |            |        |
|                   | 8/31/2021                       | DTT  | 42             | POS    | 106    | POS    |                                            |        |            |        |                                            |        |            |        |
|                   | 10/5/2021                       | DTT  | 47             | POS    | 97     | POS    |                                            |        |            |        |                                            |        |            |        |
|                   | 10/12/2021                      | DTT  | 44             | POS    | 113    | POS    |                                            |        |            |        |                                            |        |            |        |
|                   | 10/26/2021                      | DTT  | 46             | POS    | 104    | POS    |                                            |        |            |        |                                            |        |            |        |
|                   | Positive Control Shift (Strong) |      | 414            | POS    | 501    | POS    | 439                                        | POS    | 510        | POS    | 456                                        | POS    | 503        | POS    |
|                   | Positive Control (Weak)         |      | 165            | POS    | 240    | POS    | 181                                        | POS    | 248        | POS    | 207                                        | POS    | 247        | POS    |
|                   | Negative Control                |      | 297            |        | 294    |        | 302                                        |        | 307        |        | 290                                        |        | 303        |        |
|                   | HLA Class I Expression          |      | 481            |        | 529    |        | 509 (↑6%)                                  |        | 543 (↑3%)  |        | 512 (↑6%)                                  |        | 538 (↑2%)  |        |
|                   | HLA Class II Expression         |      | NA             |        | 684    |        | NA                                         |        | 677 (↓1%)  |        | NA                                         |        | 657 (↓4%)  |        |
|                   | CD38 Expression                 |      | 258            |        | 260    |        | 226 (↓12%)                                 |        | 201 (↓23%) |        | 227 (↓12%)                                 |        | 213 (↓18%) |        |
| Surrogate Donor B | 6/19/2021                       | Neat | 23             | neg    | 127    | POS    | -11                                        | neg    | -67        | neg    | -14                                        | neg    | -62        | neg    |
|                   | 8/31/2021                       | Neat | 21             | neg    | 126    | POS    | -14                                        | neg    | -73        | neg    | -18                                        | neg    | -64        | neg    |
|                   | 10/5/2021                       | Neat | 20             | neg    | 121    | POS    | -24                                        | neg    | -68        | neg    | -22                                        | neg    | -67        | neg    |
|                   | 10/12/2021                      | Neat | 22             | neg    | 122    | POS    | -21                                        | neg    | -67        | neg    | -17                                        | neg    | -66        | neg    |
|                   | 10/26/2021                      | Neat | 21             | neg    | 123    | POS    | -16                                        | neg    | -69        | neg    | -21                                        | neg    | -55        | neg    |
|                   | 6/19/2021                       | DTT  | 22             | neg    | 111    | POS    |                                            |        |            |        |                                            |        |            |        |
|                   | 8/31/2021                       | DTT  | 20             | neg    | 115    | POS    |                                            |        |            |        |                                            |        |            |        |
|                   | 10/5/2021                       | DTT  | 19             | neg    | 124    | POS    |                                            |        |            |        |                                            |        |            |        |
|                   | 10/12/2021                      | DTT  | 20             | neg    | 119    | POS    |                                            |        |            |        |                                            |        |            |        |
|                   | 10/26/2021                      | DTT  | 23             | neg    | 116    | POS    |                                            |        |            |        |                                            |        |            |        |
|                   | Positive Control Shift (Strong) |      | 433            | POS    | 459    | POS    | 409                                        | POS    | 442        | POS    | 422                                        | POS    | 441        | POS    |
|                   | Positive Control (Weak)         |      | 180            | POS    | 214    | POS    | 149                                        | POS    | 183        | POS    | 177                                        | POS    | 198        | POS    |
|                   | Negative Control                |      | 281            |        | 258    |        | 315                                        |        | 282        |        | 301                                        |        | 277        |        |
|                   | HLA Class I Expression          |      | 560            |        | 550    |        | 600 (↑7%)                                  |        | 581 (↑6%)  |        | 623 (↑11%)                                 |        | 602 (↑9%)  |        |
|                   | HLA Class II Expression         |      | NA             |        | 584    |        | NA                                         |        | 640 (↑10%) |        | NA                                         |        | 636 (↑9%)  |        |
|                   | CD38 Expression                 |      | 246            |        | 254    |        | 227 (↓8%)                                  |        | 185 (↓27%) |        | 234 (↓5%)                                  |        | 190 (↓25%) |        |

Crossmatch positive cutoff: T-cell +39, B-cell +70
