# Supplementary material for: Daratumumab Interferes with Histocompatibility Crossmatch Impacting Immunological Assessment in Solid Organ Transplantation
Source: Preprints.org preprint supplement (doi:10.20944/preprints202209.0161.v1), 2022-09-13
Supplement: Supplementary file 3 [file supplementary]

## Deceased Donor Crossmatch History

| Deceased Donor |            | Crossmatch | Recipient Serum |            | T Cell Crossmatch* |     | B Cell Crossmatch* |     |
|----------------|------------|------------|-----------------|------------|--------------------|-----|--------------------|-----|
| Number         | Blood Type | Date       | Category        | Date       | Result             | MCS | Result             | MCS |
| 1              | A1         | 06/27/2020 | Current         | 06/19/2020 | POSITIVE           | 61  | POSITIVE           | 152 |
| 2              | A1B        | 07/13/2020 | Current         | 06/19/2020 | Negative           | 39  | POSITIVE           | 74  |
|                |            |            | Historic        | 06/06/2020 | Negative           | 37  | POSITIVE           | 84  |
| 3              | A1         | 07/20/2020 | Current         | 06/19/2020 | Negative           | 21  | POSITIVE           | 154 |
| 4              | A1B        | 07/26/2020 | Current         | 06/19/2020 | POSITIVE           | 132 | POSITIVE           | 197 |
| 5              | Non-A1B    | 07/28/2020 | Current         | 06/19/2020 | POSITIVE           | 80  | POSITIVE           | 219 |
| 6              | A1         | 07/29/2020 | Current         | 06/19/2020 | POSITIVE           | 85  | POSITIVE           | 139 |
| 7              | A          | 08/01/2020 | Current         | 06/19/2020 | POSITIVE           | 94  | POSITIVE           | 181 |
| 8              | A          | 08/05/2020 | Current         | 06/19/2020 | POSITIVE           | 116 | POSITIVE           | 215 |
| 9              | A1B        | 08/08/2020 | Current         | 08/03/2020 | POSITIVE           | 128 | POSITIVE           | 192 |
|                |            |            | Historic        | 06/19/2020 | POSITIVE           | 133 | POSITIVE           | 192 |
| 10             | A          | 08/11/2020 | Current         | 08/03/2020 | POSITIVE           | 132 | POSITIVE           | 215 |
|                |            |            | Historic        | 06/19/2020 | POSITIVE           | 134 | POSITIVE           | 216 |
| 11             | A1         | 08/12/2020 | Current         | 08/03/2020 | Negative           | 25  | POSITIVE           | 164 |
|                |            |            | Historic        | 06/19/2020 | Negative           | 22  | POSITIVE           | 164 |
| 12             | A1         | 08/14/2020 | Current         | 08/03/2020 | POSITIVE           | 88  | POSITIVE           | 219 |
|                |            |            | Historic        | 06/19/2020 | POSITIVE           | 87  | POSITIVE           | 217 |
| 13             | A1         | 08/17/2020 | Current         | 08/03/2020 | POSITIVE           | 58  | POSITIVE           | 168 |
|                |            |            | Historic        | 06/19/2020 | POSITIVE           | 63  | POSITIVE           | 172 |
| 14             | A1         | 08/24/2020 | Current         | 08/03/2020 | Negative           | 10  | Negative           | 28  |
|                |            |            | Historic        | 06/19/2020 | Negative           | 10  | Negative           | 28  |
| 15             | A1         | 09/06/2020 | Current         | 08/31/2020 | POSITIVE           | 78  | POSITIVE           | 174 |
|                |            |            | Historic        | 06/19/2020 | Negative           | 33  | POSITIVE           | 130 |
| 16             | A1         | 09/09/2020 | Current         | 08/31/2020 | POSITIVE           | 72  | POSITIVE           | 194 |
|                |            |            | Historic        | 06/19/2020 | POSITIVE           | 70  | POSITIVE           | 192 |
| 17             | A1         | 09/12/2020 | Current         | 08/31/2020 | POSITIVE           | 60  | POSITIVE           | 203 |
|                |            |            | Historic        | 06/19/2020 | Negative           | 37  | POSITIVE           | 162 |
| 18             | A1         | 09/18/2020 | Current         | 08/31/2020 | Negative           | 36  | POSITIVE           | 90  |
|                |            |            | Historic        | 06/19/2020 | Negative           | 30  | POSITIVE           | 88  |
| 19             | A          | 09/19/2020 | Current         | 08/31/2020 | POSITIVE           | 69  | POSITIVE           | 101 |
|                |            |            | Historic        | 06/19/2020 | POSITIVE           | 73  | POSITIVE           | 106 |
| 20             | AB         | 10/06/2020 | Current         | 09/28/2020 | POSITIVE           | 57  | POSITIVE           | 142 |
|                |            |            | Historic        | 06/19/2020 | POSITIVE           | 55  | POSITIVE           | 142 |
| 21             | B          | 10/09/2020 | Current         | 10/05/2020 | Negative           | 26  | POSITIVE           | 185 |
|                |            |            | Historic        | 06/19/2020 | Negative           | 23  | POSITIVE           | 186 |
| 22             | A1         | 10/09/2020 | Current         | 10/05/2020 | POSITIVE           | 158 | POSITIVE           | 233 |
|                |            |            | Historic        | 06/19/2020 | POSITIVE           | 155 | POSITIVE           | 239 |
| 23             | A1         | 10/14/2020 | Current         | 10/05/2020 | POSITIVE           | 113 | POSITIVE           | 141 |
|                |            |            | Historic        | 06/19/2020 | POSITIVE           | 89  | POSITIVE           | 142 |
| 24             | A1         | 10/23/2020 | Current         | 10/12/2020 | POSITIVE           | 52  | POSITIVE           | 137 |
| 25             | A1         | 10/30/2020 | Current         | 10/26/2020 | POSITIVE           | 54  | POSITIVE           | 109 |
| 26             | A1         | 11/06/2020 | Current         | 10/26/2020 | POSITIVE           | 45  | POSITIVE           | 129 |
|                |            |            | Historic        | 10/12/2020 | POSITIVE           | 49  | POSITIVE           | 137 |
| 27             | AB         | 11/06/2020 | Current         | 10/26/2020 | POSITIVE           | 127 | POSITIVE           | 221 |

\*Cutoff for Positive Crossmatch: T cell >39, B cell >70  
MCS, Median Channel Shift
